# Supplementary material for: Identification and validation of AIB1 and EIF5A2 for noninvasive detection of bladder cancer in urine samples
Source: PubMed Central journal article supplement (PMC5173089; doi:10.18632/oncotarget.9406), 2016-05-17
Supplement: oncotarget-07-41703-s001.pdf [file oncotarget-07-41703-s001.pdf]

## SUPPLEMENTARY TABLE

**Supplementary Table S1: Diagnostic efficiency of AIB1 and EIF5A2 alone and model for NMIBC in training and independent validation sets.**

|                       | Training set               |                  |                    |                   |                    |
|-----------------------|----------------------------|------------------|--------------------|-------------------|--------------------|
|                       | AIB1                       | <i>P</i> -value* | EIF5A2             | <i>P</i> -value** | Model              |
| AUC (95% CI)          | 0.804(0.715-0.875)         | 0.02             | 0.708(0.611-0.793) | <0.0001           | 0.896(0.822-0.947) |
| Sensitivity %(95% CI) | 73(59-84)                  |                  | 64(50-76)          |                   | 87(76-95)          |
| Specificity %(95%CI)  | 88(76-96)                  |                  | 78(64-89)          |                   | 92(81-98)          |
| PPV %(95% CI)         | 87(74-95)                  |                  | 76(61-87)          |                   | 92(82-98)          |
| NPV %(95% CI)         | 75(62-85)                  |                  | 66(53-78)          |                   | 87(75-95)          |
|                       | Independent validation set |                  |                    |                   |                    |
| AUC (95% CI)          | 0.792(0.722-0.850)         | 0.0001           | 0.684(0.608-0.753) | <0.0001           | 0.872(0.812-0.919) |
| Sensitivity %(95% CI) | 73(63-82)                  |                  | 63(52-73)          |                   | 84(75-91)          |
| Specificity %(95%CI)  | 86(76-93)                  |                  | 74(62-83)          |                   | 91(82-96)          |
| PPV %(95% CI)         | 86(63-93)                  |                  | 74(63-84)          |                   | 92(84-97)          |
| NPV %(95% CI)         | 72(62-81)                  |                  | 62(51-72)          |                   | 82(72-90)          |

NMIBC=non-muscle-invasive bladder cancer; AUC=area under the curve

*P*-value\* = Model AUC vs AIB1 AUC for the training and independent validation sets

*P*-value\*\*=Model AUC vs EIF5A2 AUC for the training and independent validation sets
